# Supplementary material for: Functional Analysis of Developmentally Regulated Geneschs7andsec22in the AscomyceteSordaria macrospora
Source: Oxford University Press journal article supplement (doi:10.1534/g3.115.017681), 2015-04-17
Supplement: 017681_017681si.pdf [file 017681_017681si.pdf]

**Functional analysis of developmentally regulated genes *chs7* and *sec22* in the ascomycete *Sordaria macrospora***

Stefanie Traeger and Minou Nowrousian\*

Lehrstuhl für Allgemeine und Molekulare Botanik, Ruhr-Universität Bochum, 44780 Bochum, Germany

\*corresponding author:

Minou Nowrousian, Ph.D., Lehrstuhl für Allgemeine und Molekulare Botanik, Fakultät für Biologie und Biotechnologie, Ruhr-Universität Bochum, Universitätsstr. 150, 44780 Bochum, Germany, phone: +49 234 3224588, email: minou.nowrousian@rub.de

Supporting Figures 1-3

Supporting Table 1

**DOI: 10.1534/g3.115.017681**

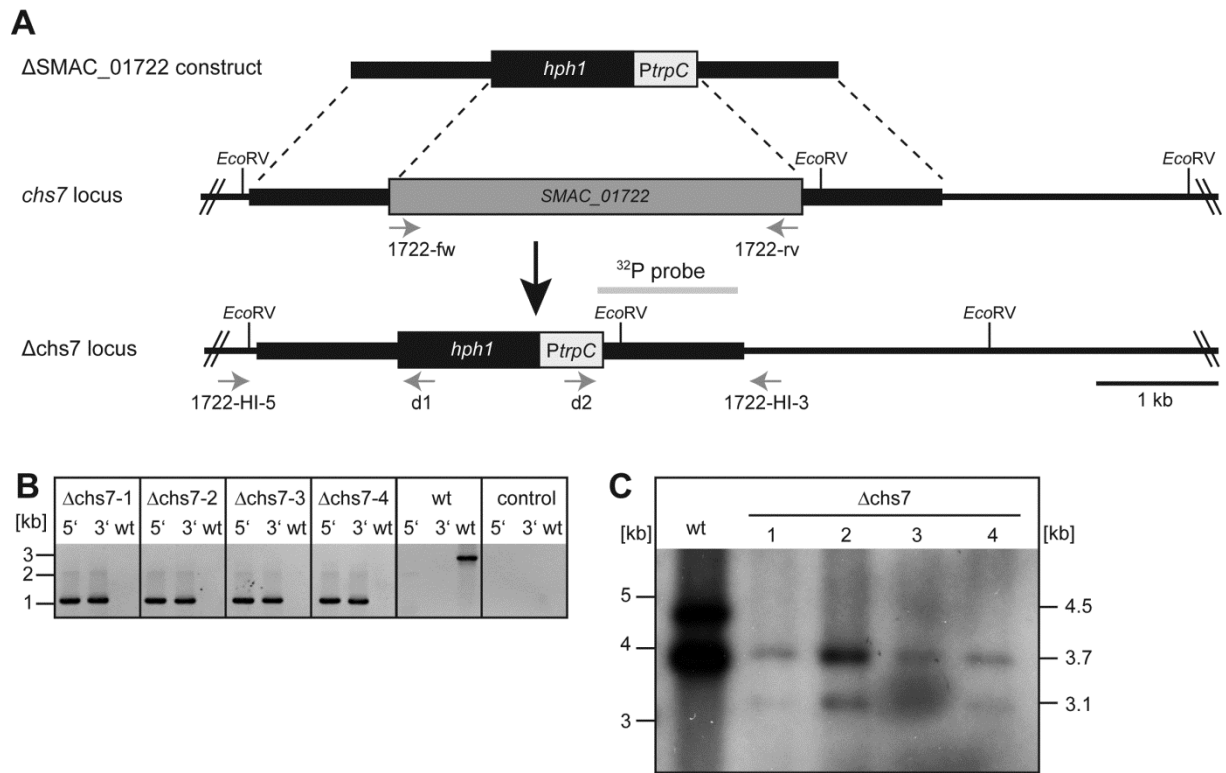

**Figure S1.** Deletion of *S. macrospora chs7*. **A.** Deletion strategy. Primers for verification are indicated by gray arrows, sequences are given in Table 2. **B.** PCR verification of *chs7* deletion strains. Primers used for amplification of the 5' (1722-HI-5/d1) and 3' (1722-HI-3/d2) flanks as well as the wild type *chs7* (1722-fw/1722-rv) are shown in A. **C.** Southern blot analysis of *chs7* deletion strains. Strains are the same as in B. Genomic DNA was digested with *EcoRV* and probed with the *chs7* 3' flank as indicated in A.

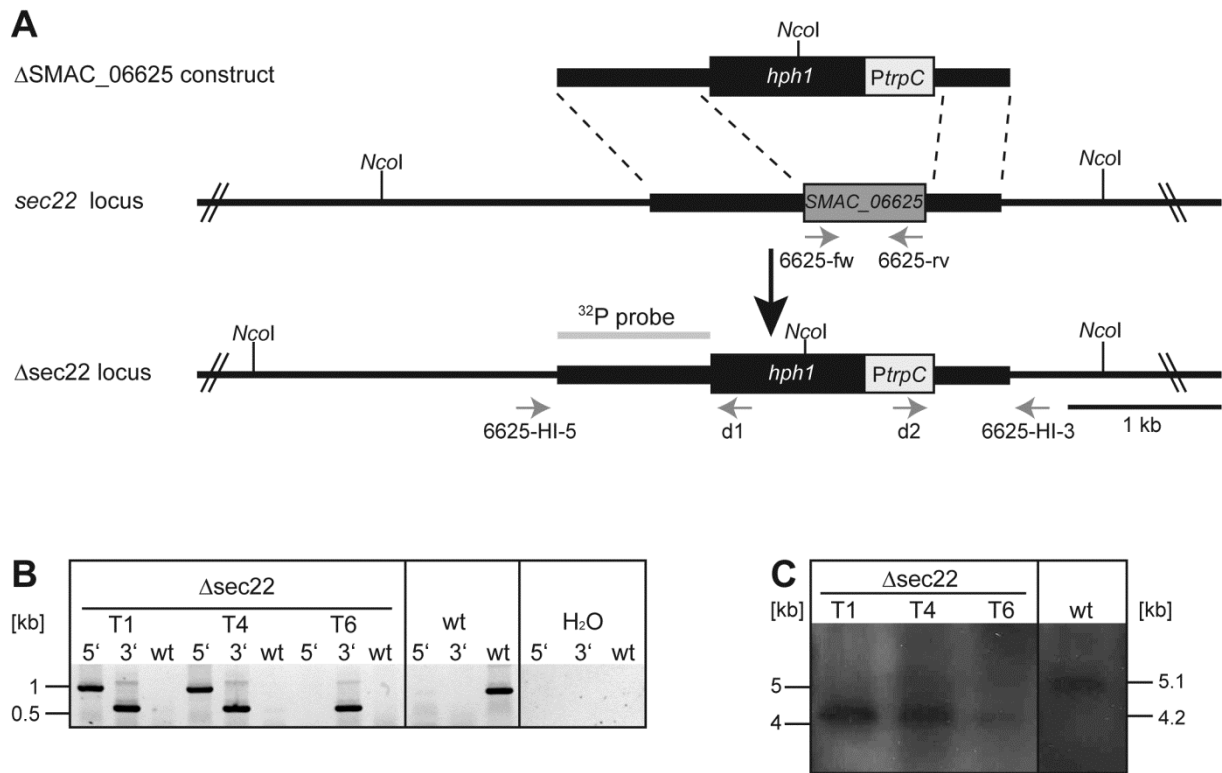

**Figure S2.** Deletion of *S. macrospora sec22*. **A.** Deletion strategy. Primers for verification are indicated by gray arrows, sequences are given in Table 2. **B.** PCR verification of *sec22* deletion strains. Isolate numbers of strains are S121285 (T1), S121345 (T4), and S121397 (T6). Primers used for amplification of the 5' (6625-HI-5/d1) and 3' (6625-HI-3/d2) flanks as well as the wild type *sec22* (6625-fw/6625-rv) are shown in A. **C.** Southern blot analysis of *sec22* deletion strains. Genomic DNA was digested with *NcoI* and probed with the *sec22* 5' flank as indicated in A.

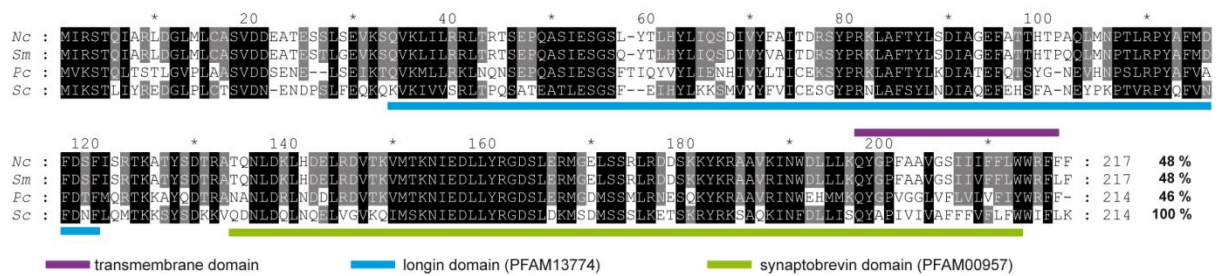

**Figure S3.** Multiple alignment of SEC22 homologs from four ascomycetes. SEC22 homologs from the Sordariomycetes *Neurospora crassa* (Nc, XP\_960888.1) and *Sordaria macrospora* (Sm, SMAC\_06625, XP\_003346158.1), the Pezizomycete *Pyronema confluens* (Pc, CCX04245.1), and the Saccharomycete *Saccharomyces cerevisiae* (Sc, AAB67373.1) were aligned. Sequence identity compared to the *S. cerevisiae* Sec22p is given in % at the end of each sequence.

**Table S1. Oligonucleotides used in the study.**

| Name         | Sequence 5'-3'                                                   | Specificity                                                                         |
|--------------|------------------------------------------------------------------|-------------------------------------------------------------------------------------|
| d1           | CGATGGCTGTGTAGAAGTACTCGC                                         | within <i>hph</i>                                                                   |
| d2           | ATCCGCCTGGACGACTAAACCAA                                          |                                                                                     |
| 426-3        | CCCGATTTAGAGCTTGACGG                                             | within pRS426 (nt 1651-1670)                                                        |
| 426-5        | AGCAGAGCGAGGTATGTAGG                                             | within pRS426 (nt 2935-2954)                                                        |
| 1722-fw      | GACTATCAACTATCTGGGGG                                             | detection of <i>chs7</i>                                                            |
| 1722-rv      | CTATCCCCTCGAACTCTGCC                                             |                                                                                     |
| 1722 5-fw    | GTAACGCCAGGGTTTTCCAGTCACGACGGGCAACAT<br>TACATTCTCCGG             | amplification of 5' flank of<br><i>chs7</i> for knockout construct<br>pΔSMAC_01722  |
| 1722 5-rv    | CGAGGGCAAAGGAATAGGGTTCCGTTGCTTGTCCCT<br>TCTTTCTCC                |                                                                                     |
| 1722 3-fw    | GCCCCAAAATGCTCCTTCAATATCAGTTGCGGACAGA<br>GGTAGTTTGGG             | amplification of 3' flank of<br><i>chs7</i> for knockout construct<br>pΔSMAC_01722  |
| 1722 3-rv    | GCGGATAACAATTTACACAGGAAACAGACCAGTCAC<br>TTTGAGACGGACTTCA         |                                                                                     |
| 1722-HI-5    | CGGCAGTATGTGCCTTTGGC                                             | detection of homologous<br>integration of <i>chs7</i> 5' flank                      |
| 1722-HI-3    | GGGGCTCCTATGACTATTG                                              | detection of homologous<br>integration of <i>chs7</i> 3' flank                      |
| 6625-fw      | CCGCTCAACACAAATTGCC                                              | detection of <i>sec22</i>                                                           |
| 6625-rv      | CAAAACAAGAACCTCCACCAC                                            |                                                                                     |
| 6625-5-fw    | GTAACGCCAGGGTTTTCCAGTCACGACGGAATTCCA<br>GAGTTGCGCCGTAAGATCACCG   | amplification of 5' flank of<br><i>sec22</i> for knockout construct<br>pΔSMAC_06625 |
| 6625-5-rv    | CGAGGGCAAAGGAATAGGGTTCCGTTGAGGTGGTGAC<br>GACCTTGGATTTCTCTCG      |                                                                                     |
| 6625-3-fw    | GCCCCAAAATGCTCCTTCAATATCAGTTGCGCGGATC<br>ATCACAGGCTGAGGCCAT      | amplification of 3' flank of<br><i>sec22</i> for knockout construct<br>pΔSMAC_06625 |
| 6625-3-rv    | GCGGATAACAATTTACACAGGAAACAGCGAATTTCGC<br>GGTTGCCATTTCTGTCTGGAACC |                                                                                     |
| 6625-HI-5    | CCGGGATTAGGTCCAAAATGCC                                           | detection of homologous<br>integration of <i>sec22</i> 5' flank                     |
| 6625-HI-3    | GGAAGTTGTGCGGTTATGTGATGG                                         | detection of homologous<br>integration of <i>sec22</i> 3' flank                     |
| Prom6625-fw  | CCCTCGAGGTCGACGGTATCGATAGGAACTATTCCCT<br>TGTTGCTCATCC            | amplification of 1 kb<br>upstream promoter region of<br><i>sec22</i>                |
| Prom6625-rv  | GCTTCACTTGC GACTTGACTTCGCC                                       |                                                                                     |
| 6625-gfp-fw  | GGCGAAGTCAAGTCGCAAGTGAAGC                                        | amplification of <i>sec22-egfp</i><br>fusion construct                              |
| 6625-gfp-rv  | ATGGCCTCAGCCTGTGATGATCCGCTTACTTGTACAG<br>CTCGTCCATGCCG           |                                                                                     |
| Term6625-fw  | CGGCATGGACGAGCTGTACAAGTAAGCGGATCATCAC<br>AGGCTGAGGCCAT           | amplification of 1 kb<br>downstream terminator<br>region of <i>sec22</i>            |
| Term6625-rv  | GCGGCCGCTCTAGAAGTGGATCATGAGTTCCAGC<br>AACAGCAACAGCA              |                                                                                     |
| SEC22-gfp-fw | ACAGCTACAGATCTAAGCTTATGATCCGCTCAACACA<br>AAT                     | amplification of <i>sec22</i> with<br>pDS23 overhang                                |
| SEC22-gfp-rv | CCTCGCCCTTGCTCACCATAAACAAGAACCTCCACCA<br>CAA                     |                                                                                     |
| SSU1         | ATCCAAGGAAGGCAGCAGGC                                             | RT-qPCR 18S rRNA                                                                    |
| SSU2         | TGGAGCTGGAATTACCGCG                                              |                                                                                     |
| app-for2     | GGAGATAGCTGGAGGGCTGA                                             | RT-qPCR <i>app</i>                                                                  |
| app-rev2     | ATCTCGGGCTGACTTCCATC                                             |                                                                                     |
| 6625-qRT-fw  | AGGGACGTCAACCAAGGTCAT                                            | RT-qPCR <i>sec22</i>                                                                |
| 6625-qRT-rv  | CATCCCTCAACCGACTGCT                                              |                                                                                     |

|              |                       |                       |
|--------------|-----------------------|-----------------------|
| 1930-qRT-fw  | GGTGAAAAGCTTGACGACCTG | RT-qPCR <i>ykt6</i>   |
| 1930-qRT-rv  | CCAGACAGCACGAGTTTTGC  |                       |
| ppg1-for     | CTCCGTGACACCACCTTCAG  | RT-qPCR <i>ppg1</i>   |
| ppg1-rev     | GGAGGCATAGCGCTTCCA    |                       |
| ppg2for      | CGGTATCTCGCCTCTCAACGT | RT-qPCR <i>ppg2</i>   |
| ppg2rev      | GTTGTGCTCCCATTGTGCAGA |                       |
| Smta-1-for   | TGATCCGCACTCACTTCCAT  | RT-qPCR <i>Smta-1</i> |
| Smta-1-rev   | GGGAGTGGCATCAACCGTAT  |                       |
| SmtA-2-for   | TCGCCATGACAGCATCTTCT  | RT-qPCR <i>SmtA-2</i> |
| SmtA-2-rev   | GTCGAGCGAAAACCTTGAG   |                       |
| nox1_RT_fw   | GGACATGGATAACCACGCAGA | RT-qPCR <i>nox1</i>   |
| nox1_RT_rv   | TTCCGCATGCTCTCAAAGAA  |                       |
| nox2_RT_fw_2 | CTGGTTCTTTTCCCCGTCTG  | RT-qPCR <i>nox2</i>   |
| nox2_RT_rv_2 | GGACCATGCTGTCGTGATGT  |                       |
| sac1_RT_fw   | AGGCTTGCACTTCTCTTCGG  | RT-qPCR <i>sac1</i>   |
| sac1_RT_rv   | TTGAGCAGGCCCGTTAATCT  |                       |
| SMU3584for   | GGTCATGGGCCACAGTCTCG  | RT-qPCR <i>pks</i>    |
| SMU3584rev   | CGTGGCTGTTTCATCGTGCAC |                       |
| SMU6905for   | GGCATCACGGTCAATGGTGT  | RT-qPCR <i>teh</i>    |
| SMU6905rev   | TGCTCAGCCATCATCCTCTCA |                       |
| SMU9390for   | TCAACATCAACACCCGTGGC  | RT-qPCR <i>tih</i>    |
| SMU9390rev   | GTAAACAGCGTGCTTGGGCA  |                       |
| pro41-for    | ACATGGAGGCAAATGGGAAG  | RT-qPCR <i>pro41</i>  |
| pro41-rev    | CGTCTGAGCCAATGATGCTC  |                       |
