# Supplementary material for: Functional Analysis of Developmentally Regulated Geneschs7andsec22in the AscomyceteSordaria macrospora
Source: Oxford University Press journal article supplement (doi:10.1534/g3.115.017681), 2015-04-17
Supplement: 017681_figures2.pdf [file 017681_figures2.pdf]

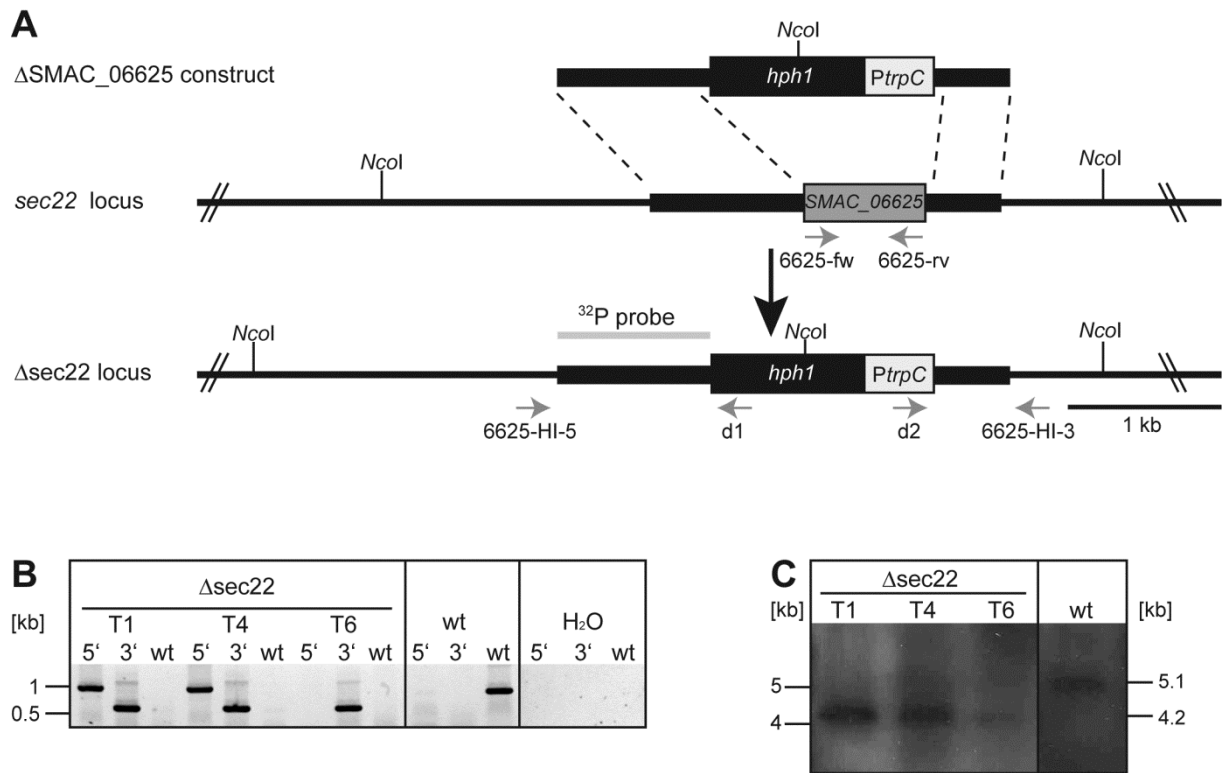

**Figure S2.** Deletion of *S. macrospora sec22*. **A.** Deletion strategy. Primers for verification are indicated by gray arrows, sequences are given in Table 2. **B.** PCR verification of *sec22* deletion strains. Isolate numbers of strains are S121285 (T1), S121345 (T4), and S121397 (T6). Primers used for amplification of the 5' (6625-HI-5/d1) and 3' (6625-HI-3/d2) flanks as well as the wild type *sec22* (6625-fw/6625-rv) are shown in A. **C.** Southern blot analysis of *sec22* deletion strains. Genomic DNA was digested with *NcoI* and probed with the *sec22* 5' flank as indicated in A.
