# Supplementary material for: Functional Analysis of Developmentally Regulated Geneschs7andsec22in the AscomyceteSordaria macrospora
Source: Oxford University Press journal article supplement (doi:10.1534/g3.115.017681), 2015-04-17
Supplement: 017681_figures3.pdf [file 017681_figures3.pdf]

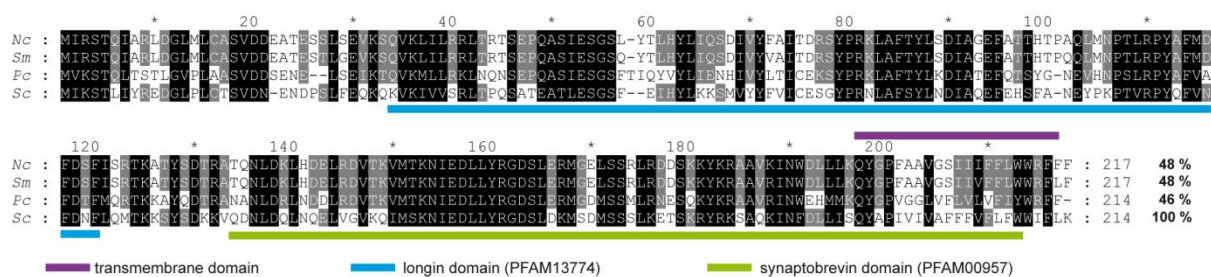

**Figure S3.** Multiple alignment of SEC22 homologs from four ascomycetes. SEC22 homologs from the Sordariomycetes *Neurospora crassa* (Nc, XP\_960888.1) and *Sordaria macrospora* (Sm, SMAC\_06625, XP\_003346158.1), the Pezizomycete *Pyronema confluens* (Pc, CCX04245.1), and the Saccharomycete *Saccharomyces cerevisiae* (Sc, AAB67373.1) were aligned. Sequence identity compared to the *S. cerevisiae* Sec22p is given in % at the end of each sequence.
