# Supplementary material for: Functional Analysis of Developmentally Regulated Genes chs7 and sec22 in the Ascomycete Sordaria macrospora
Source: PubMed Central journal article supplement (PMC4478551; doi:10.1534/g3.115.017681), 2015-04-14
Supplement: supp_g3.115.017681_FigureS1.pdf [file supp_g3.115.017681_FigureS1.pdf]

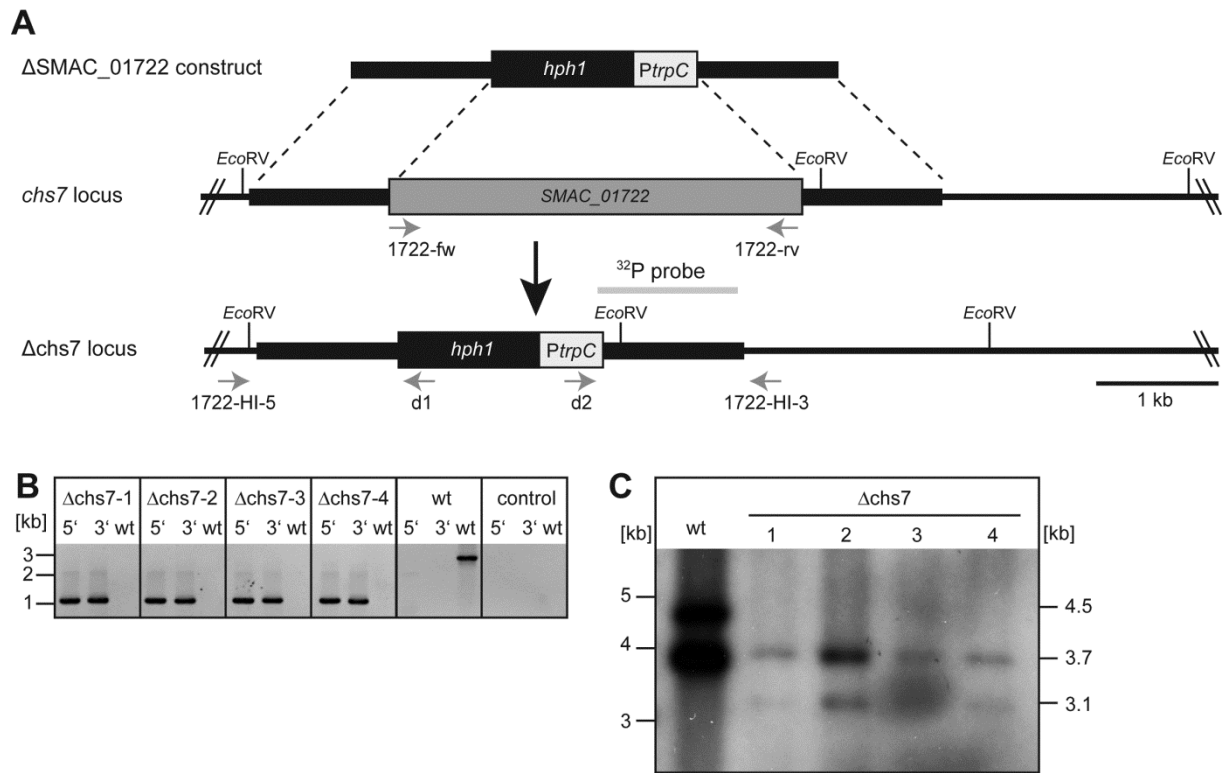

**Figure S1.** Deletion of *S. macrospora chs7*. **A.** Deletion strategy. Primers for verification are indicated by gray arrows, sequences are given in Table 2. **B.** PCR verification of *chs7* deletion strains. Primers used for amplification of the 5' (1722-HI-5/d1) and 3' (1722-HI-3/d2) flanks as well as the wild type *chs7* (1722-fw/1722-rv) are shown in A. **C.** Southern blot analysis of *chs7* deletion strains. Strains are the same as in B. Genomic DNA was digested with *EcoRV* and probed with the *chs7* 3' flank as indicated in A.
